# Supplementary material for: Development of a HAMSTER: Hyperspectral Albedo Maps dataset with high Spatial and TEmporal Resolution
Source: Copernicus journal article supplement (doi:10.5194/egusphere-2024-167), 2024-03-06
Supplement: Supplementary file [file egusphere-2024-167-AC1-supplement.pdf]

## Response to Comments by Reviewer #1

We would like to thank the referee for the valuable comments on our manuscript. Please find below the answers to the issues. We report in blue the comments by the reviewer, and our answers can be found below each comment in black.

### Major issues:

*Choice of MODIS data: The MCD product user manuals quite clearly state that “We recommend that users use the MCD43D 30 arcsecond products (or the 30 arcsecond MCD43GF gapfilled products) instead of the MCD43C products as much as possible, since the MCD43C products merely represent averages of the direct BRDF retrievals obtained with the MCD43D processing. The averaged MCD43C products thus necessarily include various QA flags within each pixel, and are therefore less rigorously high quality than the MCD43D products.”* Yet, the authors have chosen to base their analysis on MCD43C3. Why?

We thank the referee for this comment, and after carefully checking the different products, we decided to entirely redo the climatology starting from the MCD43D42-48 products. We changed accordingly all the description of the MODIS product in the manuscript, and its spatial and temporal resolutions. The entire analysis, the dataset, and all plots in the paper were done using the new product. We do not find any significant difference, but we notice better quality of mountain regions.

Since the MCD43D product is offered daily, we changed the temporal resolution of our dataset from 8 to 1 day. Section 2.1, where we describe our procedure to perform the climatology, was adapted to the new algorithm and analysis. As mentioned by the referee, this allowed us to obtain a better quality for our climatology.

We also included the daily climatology product on LMU Open Data (link in the Data Availability).

It is important to note that the spatial resolution offered by the MCD43D product is too large for our final HAMSTER dataset, which also includes the spectral component. All the steps of our analysis, from the climatology to the application of the PCA algorithm are done on the MCD43D product grid (30 arc seconds), and only the final HAMSTER dataset is downscaled on a 0.05° in latitude and longitude (180 arc seconds) for file dimension reasons.

*Reference spectra: One is tempted to ask about the geographical distribution of the soil and vegetation spectra used here. For example, boreal forests are and behave quite differently from African rainforests – how well are the various regions of the Earth represented in the data? Do you have any means of assessing the uncertainty that is potentially related to misrepresented vegetation in particular, as the soil-vegetation references appeared to be heavily weighed towards soil sampling? What is the overall uncertainty of the HAMSTER data layers?*

Vegetation spectra are only present in the ECOSTRESS library. It includes a collection of many different trees, shrubs and grass spectra, for a total of 487 spectra (line 140 in the manuscript) from the United States. Among trees, it includes both deciduous and evergreen trees and both broadleaves and needle leaved trees, from ‘pinus lambertiana’ to ‘quercus douglasii’ to ‘eucalyptus ficifolia’. Among shrubs, we find from ‘agave attenuata’ to ‘baccharis

'pilularis' to 'salvia leucophylla' and many others. For grass, the dataset contains 'bromus diandrus', 'avena fatua' and normal 'grass'. Unfortunately, they do not specify the geographical distribution from which different vegetation spectra are collected. We would like to clarify that this is also the only dataset we found containing different trees and vegetation spectra.

This is different for soils spectra. The main reason to combine the three different spectra dataset (ECOSTRESS, LUCAS and ICRAF/ISRIC) comes from the need to collect spectra to cover a geographical distribution as broad as possible. While the ECOSTRESS library contains soils spectra only from the United States, the ICRAF/ISRIC dataset is a global dataset of soils spectra from 58 different countries and 785 sites (spanning Africa, Asia, Europe, North America, and South America), while LUCAS represents soils of the 28 European Union countries, including the United Kingdom. In total, our sample contains soil spectra from 82 different countries. Jiang and Fang (2019) noticed that the use of a global dataset significantly improves the accuracy of the hyperspectral soil reflectance modeling. Following their prescription, we put together one global (ICRAF/ISRIC), one continental (LUCAS) and one local (ECOSTRESS) dataset to reach the best possible accuracy in our PCA retrieval method. To our knowledge, ECOSTRESS is the only available dataset containing vegetation spectra, and thus it is not possible to assess how much vegetation might be misrepresented from a particular geographical region. We added two sentences about this in section 2.2, clearly stating this is a limitation of our approach.

We notice that our vegetation spectra are in agreement with the ones shown in Jiang and Fang (2019), where they simulated the spectra with a 3D canopy tree radiative transfer model which includes different soils as background.

The uncertainty of the HAMSTER data layers can only be assessed by its validation to other dataset, and this motivated us to validate it with SEVIRI and TROPOMI.

[Treatment of snow within the HAMSTER maps: The reference spectra did not seem to contain snow and there was no mention of simulating snow spectra with snow models. How then did you achieve the PCA deconstruction over snow? What about mixed pixels with fractional snow cover and fractional vegetation cover, how are those handled?](#)

The reference spectra contain snow measured spectra, as shown in Fig. 1, where we are plotting the 'coarse granular snow' spectrum from ECOSTRESS. In the ECOSTRESS library there are three different snow spectra: coarse granular snow, medium granular snow and fine snow. In addition, there are also frost and ice spectra, sea foam, sea water and tap water. All together, they form the 8 water and snow spectra from the ECOSTRESS library we mention in line 178 (new manuscript). The PCA handles snow as any other spectra, which means that for pixels with fractional snow and vegetation coverage the PCA can fit a linear combination of the most relevant trees, soils and snow spectra to better match the seven MODIS channels of the pixel. We included this detailed explanation in the manuscript.

[Structure: Inclusion of HAMSTER validation in section on data and methods is confusing, as these are clearly results and not source data or its processing. Recommend revising the structure to start section 3 with the validation, and then proceeding towards analysis of features in HAMSTER data.](#)

Thank you for the suggestion. We removed the Validation from the Data and Methods section. Now Data and Methods are section 2, Validation is section 3, and Results are

section 4. We kept the Validation and the Results in two separate sections, since the Validation is done comparing the climatology and HAMSTER with other albedo products, while in the Results section we analyze the different features found in the climatology and HAMSTER.

Gap filling on multiple layers: There are 5 different layers of gap filling needed – what are the respective percentages of global MODIS grid that are filled out at each of these steps? Do I understand correctly that in step 2, albedo values spanning to +/-40 (5x8) days of target date may be selected to fill the gap? 40 days during snowmelt or vegetation greenup could result in dramatically different gap-filled albedos relative to what was actually on the ground, what is the justification for this wide search window?

We included the statistics on the percentages of the gap filled pixels in the climatology (see new Fig.1). We now clearly describe how many pixels are filled at every step of the climatology. Even using the MCD43D product, to completely fill all pixels up to 90° of local solar noon zenith angle we need to move up to +/-40 days (and beyond) from the actual DOY. Only a few pixels get filled with +/- 40 days (only the very last horizontal layer above 80 degrees of local solar noon zenith angle), and this can be seen in Fig. 1. However, we still consider it very useful to fill all pixels among the local solar noon zenith angle for some possible applications, like Earth System Models and Earthshine simulations. We improved our climatological approach including a new step (step 3 in the new manuscript) to better represent snowmelt and green-up periods of the dataset. We never fill missing pixels with only values from the past or future DOYs, but we always average or linearly interpolate to avoid over or underestimation of snow coverage. We still believe this is a better assumption than using a default value for these high latitude regions, also being snow highly reflective in the visible. We included a better explanation of this in Section 2.1.

In the new climatology dataset uploaded on LMU Open Data, we also include a flag for every pixel which tells in which step the pixels have been filled. This way, users can also select to use the climatology with some missing pixels but without moving up to 40 days from the actual DOY.

#### **Minor issues:**

130 – I was under the impression that MCD products do not contain sea ice albedo or sea ice cover? Certainly the result figures show no Arctic sea ice, so why is sea ice referenced here and again in section 3? This also refers to the major issue on snow treatment – sea ice albedo is even more complex than snow, and I haven't seen anything in the manuscript about its treatment?

As the referee correctly points out, the MCD products do not contain sea ice albedo information because they do not provide sea surface albedo measurements. However, coastal regions are included in the MCD products and they show seasonal differences in surface albedo. We thank the referee for this comment, because we noticed that when we mention sea ice albedo in the manuscript this might sound misleading. For this reason, we rewrote the sentence in line 130 (old manuscript) to expand our explanation. In the results, we particularly discuss Greenland and we notice a clear difference between boreal summer and boreal winter, where sea ice albedo shows a huge difference for pixels surrounding

Greenland, and these pixels are among the ones exhibiting the largest variability in the dataset.

[Fig 7 – TROPOMI coverage extends elsewhere from Africa, why only focus the comparison there?](#)

As mentioned in line 273, the TROPOMI LER product is very different from the MODIS product since it provides surface albedo for snow/ice-free and snow/ice conditions separately. In particular, including the snow/ice conditions provided by TROPOMI, we found large differences in snow coverage, with the TROPOMI product showing substantially more extended snow coverage over the Northern Hemisphere (DOY 065, March 5th 2016). This is because the snow/ice conditions in the TROPOMI LER products do not represent the daily coverage (as in MODIS) but averages over a month. Due to the high reflectivity of snow and ice, this does not allow for a direct comparison of the two products, in particular in the visible wavelengths. The large discrepancy among the two products does not come from the PCA retrieved albedo in HAMSTER, but from the different approaches in assessing the snow-coverage by the different products. For this reason, we selected a region over Africa and the Middle East to validate HAMSTER with TROPOMI, since this region exhibits the least snow coverage and allows for a direct and consistent comparison of land surface albedo among the two products.

In the manuscript, we included a more detailed explanation to clarify why we perform the validation with TROPOMI only over Africa and the Middle East.

[Section 3 – the PCA-interpolated spectral albedos appear reasonable for most land surfaces, certainly. But I question the validity of the urban areas' spectra, there did not seem to be any reference spectra on man-made structures in the study? And how would PCA handle the extremely nonlinear shifts in land cover and surface material that are common to urban areas? Since the overall quality of MODIS albedos over cities has not been quantitatively assessed and the validity of the RossThick-LiSparse retrieval is uncertain over them, I would be very careful of highlighting those areas in particular unless the authors can prove that their spectra are valid.](#)

In the ECOSTRESS library there are 45 man-made material spectra, as mentioned in line 140 (old manuscript) and 165 (new manuscript). Among these 45 spectra, there are general construction materials (construction concrete, black gloss paint, pine wood, red smooth-faced brick, etc.), road materials (construction asphalt, construction tar, etc.), roofing materials (like copper metal and terra cotta tiles) and reflectance targets (brass plate). The PCA is able to treat these spectra as all other spectra present in the datasets. Urban areas are a linear combination of different components, like man-made materials, vegetation, and soils. This is similar to other regions of the world, such as forests or deserts, which are a linear combination of many different soils, rocks, minerals and vegetation, and are handled by the PCA in the exact same way.

Overall, the spectra of urban areas appear reasonable. They show a lower albedo than the other regions investigated, pointing towards the use of asphalt and concrete spectra in the PCA, and they show some of the features coming from forests, but the general spectral shape appears different from all other regions. We described the following in lines 444-448. We also include a cautionary remark mentioning that MODIS albedo performances for urban areas have not been assessed yet.
